# Supplementary material for: A new single-component KCaY(PO4)2:Dy3+, Eu3+nanosized phosphor with high color-rendering index and excellent thermal resistance for warm-white NUV-LED
Source: Royal Society of Chemistry journal article supplement (doi:10.1039/c6ra20912b), 2016-01-01
Supplement: c6ra20912b1.pdf [file c6ra20912b1.pdf]

## Electronic Supplementary Information (ESI)

# **A new single-component $\text{KCaY}(\text{PO}_4)_2:\text{Dy}^{3+}, \text{Eu}^{3+}$ nanosized phosphor with high color-rendering index and excellent thermal resistance for warm-white NUV-LED**

Xiao-Fei Wang,<sup>a</sup> Qi Yang,<sup>a</sup> Gui-Gen Wang,<sup>a,\*</sup> Xin-Zhong Wang,<sup>b</sup> and Jie-Cai Han<sup>a,c</sup>

<sup>a</sup> *Shenzhen Key Laboratory for Advanced Materials, Shenzhen Graduate School, Harbin Institute of Technology, Shenzhen 518055, China*

<sup>b</sup> *Shenzhen Institute of Information Technology, Shenzhen 518172, China*

<sup>c</sup> *Center for Composite Materials, Harbin Institute of Technology, Harbin 150080, China*

\*Corresponding author. Tel.: +86 755 26629471; E-mail: wanggghitsz@163.com

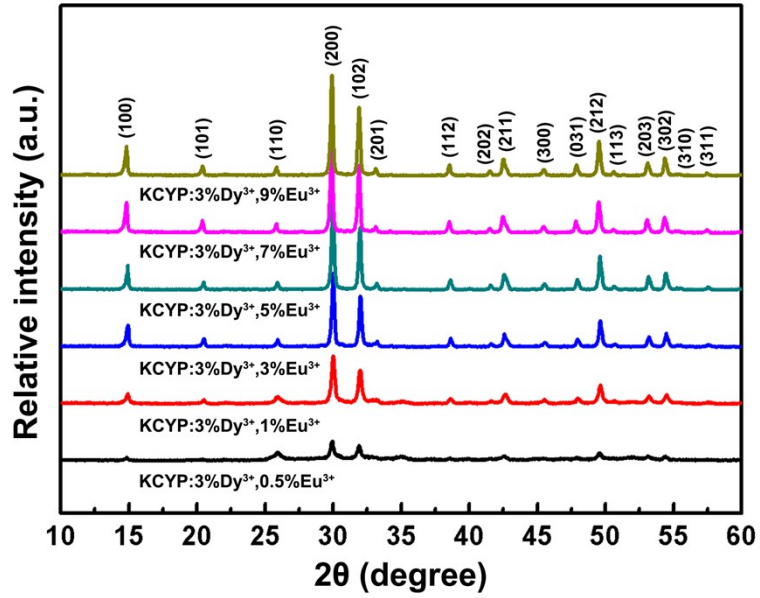

**Fig. S1** Powder XRD patterns of the as-synthesized KCYP:3%Dy<sup>3+</sup>, *n*%Eu<sup>3+</sup> specimens with various Eu<sup>3+</sup> doping contents (*n* = 0.5, 1, 3, 5, 7, and 9).

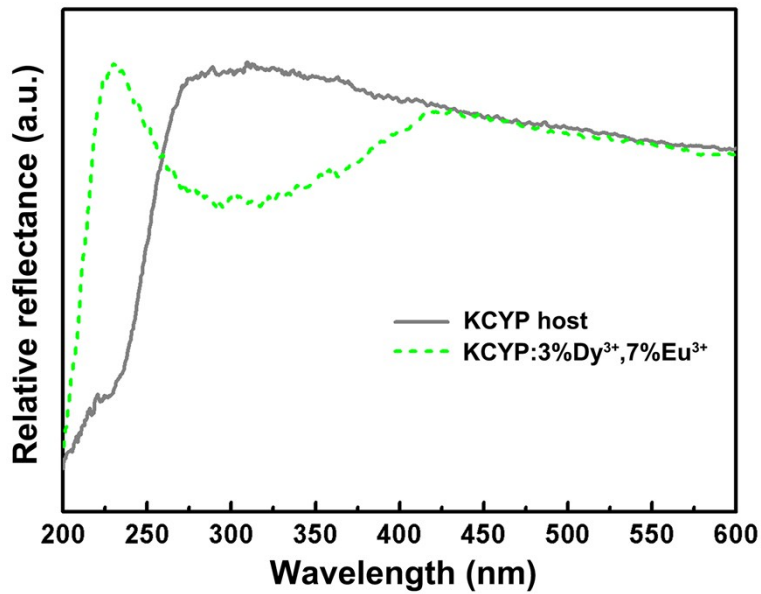

**Fig. S2** Diffuse reflection spectra of the KCYP host (gray line) and the KCYP:3%Dy<sup>3+</sup>, 7%Eu<sup>3+</sup> sample (green dash line).

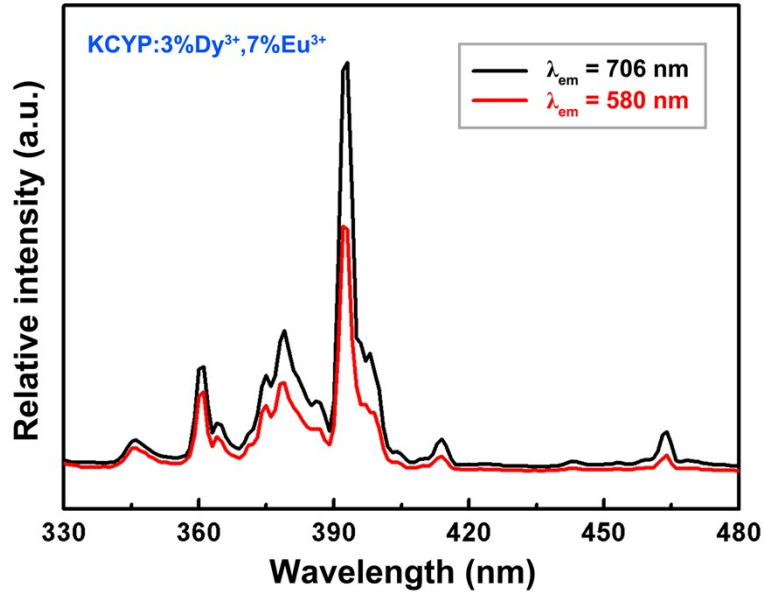

Fig. S3 Comparison of PLE spectra of the KCYP:3%Dy<sup>3+</sup>, 7%Eu<sup>3+</sup> sample upon different monitoring wavelength.

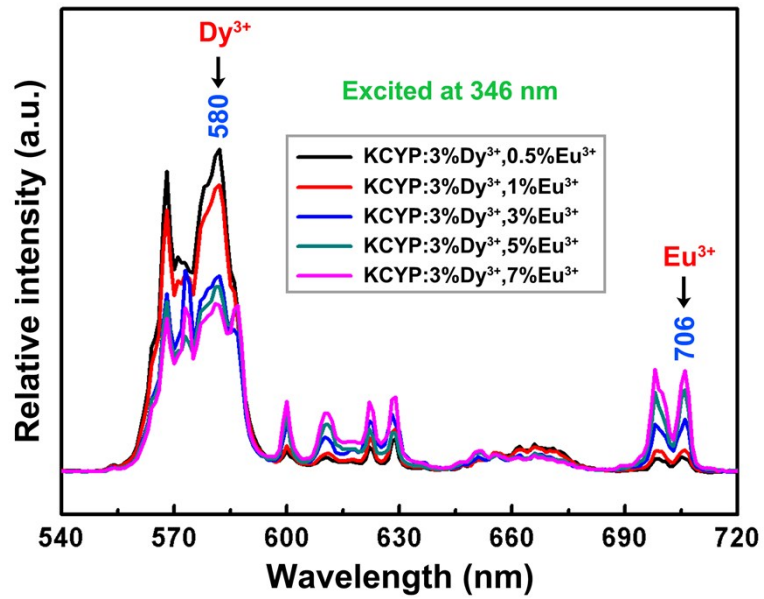

Fig. S4 PL spectra ( $\lambda_{\text{ex}} = 346 \text{ nm}$ ) of the KCYP:3%Dy<sup>3+</sup>,  $n\%$ Eu<sup>3+</sup> nanophosphor with changed  $n$  values ( $n = 0.5, 1, 3, 5, \text{ and } 7$ ).

**Table S1.** Time-resolved fluorescence dynamics of the KCYP:Dy<sup>3+</sup>, Eu<sup>3+</sup> nanosized phosphor.

| Samples                                        | $\tau_1$ ( $\mu\text{s}$ ) | $\tau_2$ ( $\mu\text{s}$ ) | $\tau_{\text{ave}}$ ( $\mu\text{s}$ ) |
|------------------------------------------------|----------------------------|----------------------------|---------------------------------------|
| KCYP:3%Dy <sup>3+</sup>                        | 121 (13%)                  | 796 (87%)                  | 708                                   |
| KCYP:3%Dy <sup>3+</sup> , 0.5%Eu <sup>3+</sup> | 114 (15%)                  | 740 (85%)                  | 646                                   |
| KCYP:3%Dy <sup>3+</sup> , 1%Eu <sup>3+</sup>   | 108 (18%)                  | 688 (82%)                  | 584                                   |
| KCYP:3%Dy <sup>3+</sup> , 3%Eu <sup>3+</sup>   | 100 (22%)                  | 668 (78%)                  | 543                                   |
| KCYP:3%Dy <sup>3+</sup> , 5%Eu <sup>3+</sup>   | 93 (25%)                   | 650 (75%)                  | 511                                   |
| KCYP:3%Dy <sup>3+</sup> , 7%Eu <sup>3+</sup>   | 82 (28%)                   | 642 (72%)                  | 485                                   |

**Table S2.** CIE 1931 chromaticity coordinates and correlated color temperature (CCT) of the KCYP:Dy<sup>3+</sup>, Eu<sup>3+</sup> nanoscale phosphor.

| Sample composition                             | CIE coordinates ( $x, y$ ) | CCT (K) |
|------------------------------------------------|----------------------------|---------|
| KCYP:3%Dy <sup>3+</sup> , 0.5%Eu <sup>3+</sup> | (0.354, 0.377)             | 4781    |
| KCYP:3%Dy <sup>3+</sup> , 1%Eu <sup>3+</sup>   | (0.373, 0.378)             | 4199    |
| KCYP:3%Dy <sup>3+</sup> , 3%Eu <sup>3+</sup>   | (0.403, 0.372)             | 3338    |
| KCYP:3%Dy <sup>3+</sup> , 7%Eu <sup>3+</sup>   | (0.427, 0.369)             | 2766    |
| KCYP:3%Dy <sup>3+</sup> , 9%Eu <sup>3+</sup>   | (0.464, 0.366)             | 2131    |

**Table S3.** Full set of eight CRIs and the average Ra value of the KCYP:3%Dy<sup>3+</sup>, 7%Eu<sup>3+</sup> sample.

| CRI    | R1 | R2 | R3 | R4 | R5 | R6 | R7 | R8 | Ra   |
|--------|----|----|----|----|----|----|----|----|------|
| Sample | 90 | 89 | 67 | 81 | 96 | 84 | 75 | 71 | 81.6 |

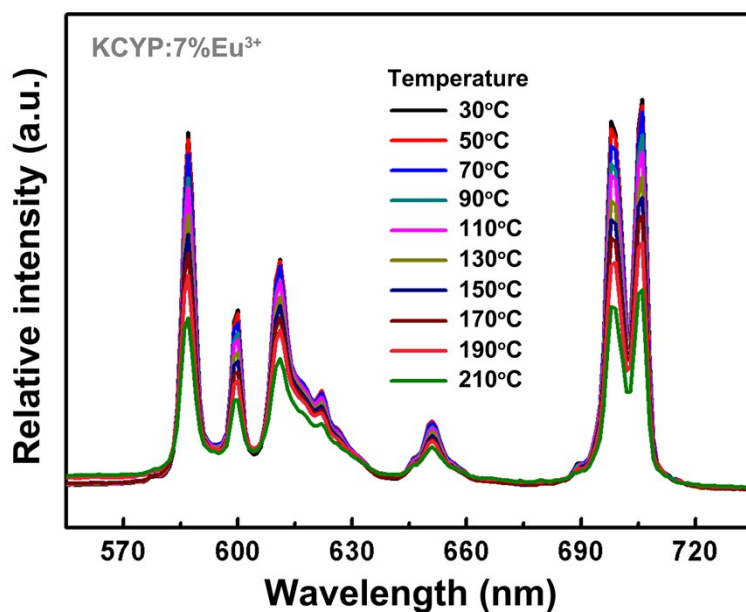

**Fig. S5** Emission spectra ( $\lambda_{\text{ex}} = 391 \text{ nm}$ ) of the KCYP:7%Eu<sup>3+</sup> sample at temperature between 30 and 210 °C.

**Table S4.** Comparison of optical properties and temperature characteristic of some reported MCaLn(PO<sub>4</sub>)<sub>2</sub> (M<sup>+</sup> = Na, K; Ln<sup>3+</sup> = Y, Gd) based phosphors with excellent performance.

| Phosphors  | Preparation method                | Emission color | <sup>a</sup> CCT (K) | <sup>b</sup> CRI (Ra) | <sup>c</sup> I <sub>150</sub> (%) | <sup>d</sup> E <sub>a</sub> (eV) | References |
|------------|-----------------------------------|----------------|----------------------|-----------------------|-----------------------------------|----------------------------------|------------|
| NCYP:Eu    | Solid-state reaction<br>(1250 °C) | Blue           | –                    | –                     | 65                                | 0.201                            | 1          |
| KCGP:Eu    | Solid-state reaction<br>(1350 °C) | Blue           | –                    | –                     | 68                                | 0.038                            | 2          |
| KCYP:Eu,Mn | Solid-state reaction<br>(1250 °C) | White          | > 4500               | < 70                  | 80                                | 0.025                            | 3          |
| KCYP:Dy,Eu | Solution-combustion<br>(400 °C)   | Warm-white     | 2766                 | 81.6                  | 72                                | 0.174                            | This work  |

NCYP:Eu represents  $\text{NaCaY}(\text{PO}_4)_2:1\%\text{Eu}^{2+}$ .

KCGP:Eu represents  $\text{KCaGd}(\text{PO}_4)_2:1\%\text{Eu}^{2+}$ .

KCYP:Eu,Mn represents  $\text{KCaY}(\text{PO}_4)_2:1\%\text{Eu}^{2+}, 5\%\text{Mn}^{2+}$ .

KCYP:Dy,Eu represents  $\text{KCaY}(\text{PO}_4)_2:3\%\text{Dy}^{3+}, 7\%\text{Eu}^{3+}$ .

<sup>a</sup>CCT: Correlated color temperature.

<sup>b</sup>CRI: Color-rendering index.

<sup>c</sup> $I_{150}$ : The relative PL intensity when the temperature is increased up to 150 °C compared to the initial intensity at room temperature and the values may change a little because of the difference in the measurement method and the activator concentration.

<sup>d</sup> $E_a$ : Activation energy.

## References

1 W. R. Liu and P. C. Lin, *Opt. Express*. 2014, **22**, A446–A451.

2 W. R. Liu, C. H. Huang, C. W. Yeh, Y. C. Chiu, Y. T. Yeh and R. S. Liu, *RSC Adv.* 2013, **3**, 9023–9028.

3 W. R. Liu, C. H. Huang, C. W. Yeh, J. C. Tsai, Y. C. Chiu, Y. T. Yeh and R. S. Liu, *Inorg. Chem.*, 2012, **51**, 9636–9641.
